# Supplementary material
Source: PubMed Central journal article supplement (PMC3953699)
Supplement: mmc1.pdf [file mmc1.pdf]

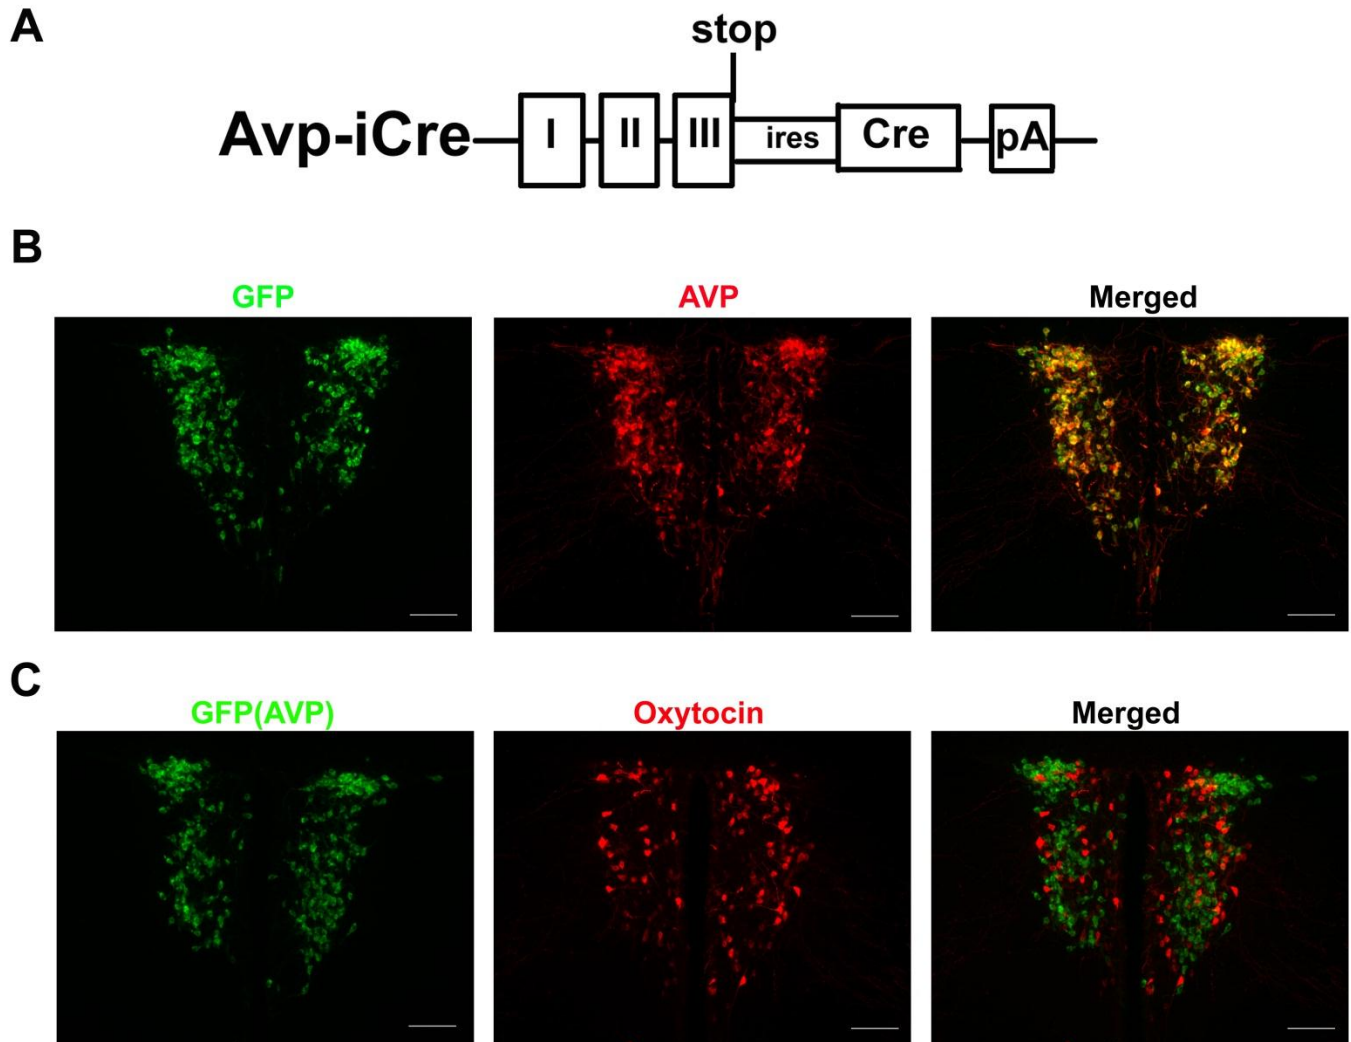

**Supplementary Figure 1:** AVP-iCre knock-in mice express Cre recombinase in AVP neurons. (A) Schematic diagram of the targeted *Avp* gene locus. (B) Immunostaining for AVP (red) in brain slices of AVP-iCre mice crossed with Cre-dependent, loxGFP reporter mice demonstrates that nearly all AVP-containing neurons (red) express Cre recombinase (green; merge=yellow). (C) AVP-iCre activity (green) does not co-localize with oxytocin (red). Scale bar=100um
